# Supplementary material for: Metabolic Dysfunctions of Intestinal Fatty Acids and Tryptophan Reveal Immuno-Inflammatory Response Activation in IgA Nephropathy
Source: Front Med (Lausanne). 2022 Feb 3;9:811526. doi: 10.3389/fmed.2022.811526 (PMC8850467; doi:10.3389/fmed.2022.811526)
Supplement: Supplementary file 2 [file Table_2.XLSX]

## Sheet: Sheet1
Table S2. Quantitative and calibration of tryptophan metabolites.
Preparation of standard reserve solution of tryptophan metabolites						Setting of chromatographic conditions for tryptophan metabolites					Quantitative and calibration of tryptophan metabolites						The recovery rate and standard relative deviation of QC sample
Cpd Name	Abbr.	CAS	M.W.	Formula		Abbr.	Prec Ion	Prod Ion	Polarity		Cpd Name	LLOD(nmol/L)	LLOQ (nmol/L)	ULOQ (nmol/L)	R^2		Cpd Name	Concentration (nmol/L)	Recovery	RSD
3-Hydroxyanthranilic acid	3-HAA	548-93-6	C7H7NO3	153.14		3-HAA	154	136	Positive		Indole	3.906	7.813	1000	0.9988		Indole	100	1.108	0.012
3-Hydroxykynurenine	3-HK	2147-61-7	C10H12N2O4	224.21		3-HK	225	208	Positive		Nicotinic acid	39.063	78.125	5000	0.9992		Nicotinic acid	500	1.099	0.021
5-Hydroxyindoleacetic acid	5-HIAA	54-16-0	C10H9NO3	191.18		5-HIAA	192	146	Positive		skatole	15.625	31.25	1000	0.9967		skatole	100	1.063	0.061
Serotonin	5-HT	50-67-9	C10H12N2O	176.21		5-HT	177	160	Positive		Anthranilic acid	1.953	3.906	125	0.9978		Anthranilic acid	50	1.087	0.012
5-Hydroxytryptophol	5-HTOL	154-02-9	C10H11NO2	177.12		5-HTOL	178	160	Positive		Indole-3-carboxaldehyde	1.953	3.906	250	0.9962		Indole-3-carboxaldehyde	100	1.125	0.008
L-5-Hydroxytryptophan	5-HTP	4350-09-08	C11H12N2O3	220.22		5-HTP	221	204	Positive		Indole-3-carbinol	39.063	78.125	5000	0.9991		Indole-3-carbinol	500	1.094	0.038
5-Methoxy-3-indoleacetic acid	5-Me-IAA	3471-31-6	C11H11NO3	205.21		5-Me-IAA	206	160	Positive		3-Hydroxyanthranilic acid	1.953	3.906	500	0.9991		3-Hydroxyanthranilic acid	50	1.097	0.015
6-Hydroxymelatonin	6-OHM	2208-41-5	C13H16N2O3	248.28		6-OHM	249	190	Positive		Tryptamine	78.125	156.25	5000	0.9982		Tryptamine	500	1.124	0.011
Anthranilic acid	AA	118-92-3	C7H7NO2	137.14		AA	138	120	Positive		indole ethanol/tryptophol	0.195	0.391	200	0.9993		indole ethanol/tryptophol	20	1.115	0.016
Indole-3-carbinol	I-3-C	700-06-1	C9H9NO	147.17		I-3-C	130	103	Positive		Indole-3-acetamide	0.024	0.049	50	0.999		Indole-3-acetamide	20	0.916	0.024
indole acrylic acid	IA	29953-71-7	C11H9NO2	187.19		IA	188	170	Positive		Indole-3-acetic acid	0.488	0.977	500	0.9983		Indole-3-acetic acid	200	1.107	0.017
Indole-3-acetic acid	IAA	87-51-4	C10H9NO2	175.18		IAA	176	130	Positive		Serotonin	1.221	2.441	20000	0.9993		Serotonin	2000	1.112	0.006
Indole-3-acetamide	IAM	879-37-8	C10H10N2O	174.2		IAM	175	130	Positive		5-Hydroxytryptophol	7.813	15.625	1000	0.9992		5-Hydroxytryptophol	100	1.101	0.029
Indole-3-carboxaldehyde	ICA	487-89-8	C9H7NO	145.16		ICA	146	118	Positive		indole acrylic acid	0.122	0.244	250	0.9983		indole acrylic acid	100	1.123	0.01
indole ethanol/tryptophol	IE	526-55-6	C10H11NO	161.2		IE	162	144	Positive		3-Indoleglyoxylic acid	0.488	0.977	500	0.9966		3-Indoleglyoxylic acid	100	1.091	0.02
3-Indoleglyoxylic acid	IGA	1477-49-2	C10H7NO3	189.17		IGA	190	144	Positive		Kynurenic acid	0.977	1.953	500	0.9975		Kynurenic acid	50	1.1	0.027
Indolelactic acid	ILA	1821-52-9	C11H11NO3	205.21		ILA	206	118	Positive		3-Indolepropionic acid	2.441	4.883	5000	0.999		3-Indolepropionic acid	500	1.111	0.016
Indican	Indican	487-60-5	C14H17NO6	295.29		Indican	294	294	Negative		5-Hydroxyindoleacetic acid	1.953	3.906	1000	0.9982		5-Hydroxyindoleacetic acid	200	1.091	0.029
Indole	Indole	120-72-9	C8H7N	117.15		Indole	118	118	Positive		L-Tryptophan	781.25	1562.5	100000	0.9992		L-Tryptophan	10000	1.113	0.007
3-Indolepropionic acid	IPA	830-96-6	C11H11NO2	189.21		IPA	190	130	Positive		Xanthurenic acid	0.488	0.977	1000	0.9991		Xanthurenic acid	100	1.075	0.01
Indoxylsulfate	IS	2642-37-7	C8H7NO4S	213.21		IS	212	132	Negative		Indolelactic acid	1.221	2.441	2500	0.9979		Indolelactic acid	1000	1.078	0.023
Kynurenine	KYN	343-65-7	C10H12N2O3	208.21		KYN	209	192	Positive		5-Methoxy-3-indoleacetic acid	0.024	0.049	100	0.9988		5-Methoxy-3-indoleacetic acid	20	1.091	0.014
Kynurenic acid	KYNA	492-27-3	C10H7NO3	189.17		KYNA	188	144	Negative		Kynurenine	19.531	39.063	20000	0.9988		Kynurenine	2000	1.113	0.011
Melatonin	Melatonin	73-31-4	C13H16N2O2	232.28		Melatonin	233	174	Positive		Indoxylsulfate	78.125	156.25	20000	0.9988		Indoxylsulfate	2000	1.111	0.011
Nicotinic acid	NA	59-67-6	C6H5NO2	123.11		NA	124	80	Positive		N-Acetyl-5-hydroxytryptamine	0.122	0.244	50	0.9991		N-Acetyl-5-hydroxytryptamine	10	1.108	0.012
N-Acetyl-5-hydroxytryptamine	NAS	1210-83-9	C12H14N2O2	218.25		NAS	219	160	Positive		L-5-Hydroxytryptophan	0.977	1.953	500	0.9994		L-5-Hydroxytryptophan	50	1.082	0.04
skatole	skatole	83-34-1	C9H9N	131.18		skatole	132	117	Positive		3-Hydroxykynurenine	3.906	7.813	1000	0.9994		3-Hydroxykynurenine	100	1.106	0.014
L-Tryptophan	Trp	73-22-3	C11H12N2O2	204.22		Trp	205	188	Positive		Melatonin	0.488	0.977	50	0.9994		Melatonin	10	1.099	0.009
Tryptamine	Tryptamine	61-54-1	C10H12N2	160.22		Tryptamine	161	144	Positive		6-Hydroxymelatonin	1.563	3.125	100	0.9987		6-Hydroxymelatonin	10	1.089	0.025
Xanthurenic acid	Xa	59-00-7	C10H7NO4	205.17		Xa	206	160	Positive		Indican	3.906	7.813	2000	0.9997		Indican	200	1.119	0.006
the results for the calibration curves
Indole
NA
skatole
AA
ICA
I-3-C
3-HAA
Tryptamine
IE
IAM
IAA
5-HT
5-HTOL
IA
IGA
KYNA
IPA
5-HIAA
Trp
Xa
ILA
5-Me-IAA
KYN
IS
NAS
5-HTP
3-HK
Melatonin
6-OHM
Indican
